# Supplementary material for: Simultaneous induction of dispersed and clustered DNA lesions compromises DNA damage response in human peripheral blood lymphocytes
Source: PubMed Central journal article supplement (PMC6209146; doi:10.1371/journal.pone.0204068), 2018-10-31
Supplement: pone.0204068.s001.pdf [file pone.0204068.s001.pdf]

**S1 Table.** Fitting coefficients of the dose response curves and repair kinetics.

| Type of result  | Coefficients | Alpha particles      | X-rays               | Mixed beams          |
|-----------------|--------------|----------------------|----------------------|----------------------|
| Dose response   | a            | 3.56                 | 10.59                | 11.89                |
|                 | b            | 1.52                 | 0.78                 | 0.68                 |
| Repair kinetics | a            | $6.0 \times 10^{-5}$ | $1.1 \times 10^{-5}$ | $2.0 \times 10^{-7}$ |
|                 | b            | $1.0 \times 10^{-5}$ | $2.7 \times 10^{-6}$ | $1.0 \times 10^{-7}$ |
|                 | c            | 2.12                 | 2.49                 | 3.37                 |
