# Supplementary material for: Simultaneous induction of dispersed and clustered DNA lesions compromises DNA damage response in human peripheral blood lymphocytes
Source: PubMed Central journal article supplement (PMC6209146; doi:10.1371/journal.pone.0204068), 2018-10-31
Supplement: pone.0204068.s002.pdf [file pone.0204068.s002.pdf]

**S2 Table.** Fitting coefficients of the comet distributions.

| Time<br>(min) | Alpha particles |                 | X-rays          |                 | Mixed beams     |                 |
|---------------|-----------------|-----------------|-----------------|-----------------|-----------------|-----------------|
|               | <i>a</i>        | <i>b</i>        | <i>a</i>        | <i>b</i>        | <i>a</i>        | <i>b</i>        |
| 0             | $1.73 \pm 0.07$ | $7.1 \pm 0.2$   | $1.99 \pm 0.06$ | $12.7 \pm 0.3$  | $2.5 \pm 1.0$   | $18.6 \pm 0.4$  |
| 15            | $1.55 \pm 0.03$ | $6.69 \pm 0.09$ | $1.64 \pm 0.06$ | $8.2 \pm 0.3$   | $2.42 \pm 0.10$ | $13.1 \pm 0.3$  |
| 30            | $1.46 \pm 0.03$ | $5.28 \pm 0.09$ | $1.57 \pm 0.06$ | $7.4 \pm 0.2$   | $2.12 \pm 0.08$ | $12.1 \pm 0.3$  |
| 60            | $1.46 \pm 0.06$ | $5.64 \pm 0.18$ | $1.64 \pm 0.04$ | $5.81 \pm 0.12$ | $2.07 \pm 0.07$ | $11.7 \pm 0.3$  |
| 120           | $1.52 \pm 0.03$ | $5.38 \pm 0.07$ | $1.65 \pm 0.05$ | $5.73 \pm 0.12$ | $2.15 \pm 0.06$ | $9.94 \pm 0.18$ |
| 180           | $1.25 \pm 0.04$ | $4.18 \pm 0.12$ | $1.21 \pm 0.05$ | $5.4 \pm 0.2$   | $1.88 \pm 0.06$ | $9.9 \pm 0.2$   |
